# Supplementary material
Source: Research Square preprint supplement (doi:10.21203/rs.3.rs-9575403/v1)
Supplement: Supplementary file 1 [file 030dc6c0e4a26b516e008604.docx]

**Supplementary Information: Agency Predicts Progress in Ancient China: A Large Language Model Approach**

**Contents**

[Table S1. Full Lead–Lag Profiles: Agency Predicting Log](#_Toc225338508)[10](#_Toc225338508)[(GDP) 1](#_Toc225338508)

[Table S2. Full Lead–Lag Profiles: Agency Predicting Log(Population) 5](#_Toc225338509)

[Table S3. Lead-window correlations between dynasty-level inventiveness and agency 9](#_Toc225338510)

[LLM Prompts 10](#_Toc225338512)

[Corpus list 27](#_Toc225338513)

The supplementary materials consist of four structured tables and two supporting documents, each serving a clear analytical or documentary purpose to complement the main text.

Table S1 presents complete lead–lag relationship profiles examining how agency predicts Log10-transformed GDP, offering a full picture of their temporal dynamic linkage.

Table S2 shows full lead–lag profiles where agency is used to predict log-transformed population, revealing temporal associations between agency and demographic scale.

Table S3 reports correlation results within lead windows linking dynasty-level inventiveness with agency, helping identify time-lagged co-movement between innovative activity and agency measures.

The LLM Prompts section documents the exact textual instructions used for large language model analyses, ensuring transparency and reproducibility of AI-based content processing.

Finally, the Corpus list provides a detailed catalogue of the literary and historical books employed in the study, clarifying data sources and supporting the replicability of textual and cultural analyses.

Together, these materials extend key empirical results, document methodological details, and list source data to facilitate reader understanding and independent verification.

# Table S1. Full Lead–Lag Profiles: Agency Predicting Log10(GDP)

This table is partitioned into six panels to systematically distinguish between two conceptual dimensions of agency (overall agency, individual agency, and collective agency) and two alternative model specifications (M1 and M2), enabling direct comparison of how each form of agency forecasts GDP across varying lead–lag horizons.

Panel A. Overall Agency, Model M1 (*N* = 56)

| **Lead** | ***β*** | **SE (HAC)** | **t** | ***p*** | **95% CI** | ***R*²** |
| --- | --- | --- | --- | --- | --- | --- |
| 0 | 0.0083 | 0.0033 | 2.506 | 0.0153 | [0.0018, 0.0148] | 0.078 |
| 10 | 0.0087 | 0.0033 | 2.611 | 0.0117 | [0.0022, 0.0152] | 0.093 |
| 20 | 0.0095 | 0.0035 | 2.743 | 0.0082 | [0.0027, 0.0163] | 0.109 |
| 30 | 0.0103 | 0.0034 | 3.012 | 0.0039 | [0.0036, 0.0170] | 0.113 |
| 40 | 0.0102 | 0.0034 | 3.046 | 0.0036 | [0.0037, 0.0168] | 0.12 |
| 50 | 0.0101 | 0.0034 | 3.02 | 0.0039 | [0.0036, 0.0167] | 0.12 |
| 60 | 0.0096 | 0.0033 | 2.945 | 0.0047 | [0.0032, 0.0160] | 0.111 |
| 70 | 0.0123 | 0.0035 | 3.474 | 0.001 | [0.0053, 0.0192] | 0.152 |
| 80 | 0.0119 | 0.0036 | 3.292 | 0.0018 | [0.0048, 0.0190] | 0.15 |
| 90 | 0.0133 | 0.0049 | 2.681 | 0.0097 | [0.0036, 0.0230] | 0.129 |
| 100 | 0.0065 | 0.0065 | 1.005 | 0.3194 | [-0.0062, 0.0191] | 0.025 |

Panel B. Overall Agency, Model M2 (*N* = 56)

| **Lead** | ***β*** | **SE (HAC)** | **t** | ***p*** | **95% CI** | ***R*²** |
| --- | --- | --- | --- | --- | --- | --- |
| 0 | 0.0083 | 0.0033 | 2.506 | 0.0153 | [0.0018, 0.0148] | 0.078 |
| 10 | 0.0087 | 0.0033 | 2.611 | 0.0117 | [0.0022, 0.0152] | 0.093 |
| 20 | 0.0095 | 0.0035 | 2.743 | 0.0082 | [0.0027, 0.0163] | 0.109 |
| 30 | 0.0103 | 0.0034 | 3.012 | 0.0039 | [0.0036, 0.0170] | 0.113 |
| 40 | 0.0102 | 0.0034 | 3.046 | 0.0036 | [0.0037, 0.0168] | 0.12 |
| 50 | 0.0101 | 0.0034 | 3.02 | 0.0039 | [0.0036, 0.0167] | 0.12 |
| 60 | 0.0096 | 0.0033 | 2.945 | 0.0047 | [0.0032, 0.0160] | 0.111 |
| 70 | 0.0123 | 0.0035 | 3.474 | 0.001 | [0.0053, 0.0192] | 0.152 |
| 80 | 0.0119 | 0.0036 | 3.292 | 0.0018 | [0.0048, 0.0190] | 0.15 |
| 90 | 0.0133 | 0.0049 | 2.681 | 0.0097 | [0.0036, 0.0230] | 0.129 |
| 100 | 0.0065 | 0.0065 | 1.005 | 0.3194 | [-0.0062, 0.0191] | 0.025 |

Panel C. Individual Agency, Model M1 (*N* = 56)

| **Lead** | ***β*** | **SE (HAC)** | ***t*** | ***p*** | **95% CI** | ***R*²** |
| --- | --- | --- | --- | --- | --- | --- |
| 0 | 0.0044 | 0.0049 | 0.902 | 0.3713 | [-0.0052, 0.0141] | 0.015 |
| 10 | 0.0029 | 0.0051 | 0.558 | 0.5792 | [-0.0072, 0.0129] | 0.006 |
| 20 | 0.005 | 0.005 | 1.004 | 0.3196 | [-0.0048, 0.0148] | 0.018 |
| 30 | 0.0053 | 0.0051 | 1.045 | 0.3007 | [-0.0047, 0.0153] | 0.019 |
| 40 | 0.0063 | 0.005 | 1.269 | 0.2099 | [-0.0034, 0.0160] | 0.027 |
| 50 | 0.0088 | 0.0049 | 1.803 | 0.077 | [-0.0008, 0.0183] | 0.05 |
| 60 | 0.0057 | 0.006 | 0.955 | 0.344 | [-0.0060, 0.0174] | 0.021 |
| 70 | 0.0057 | 0.0071 | 0.806 | 0.4239 | [-0.0082, 0.0196] | 0.018 |
| 80 | 0.0045 | 0.0069 | 0.658 | 0.5135 | [-0.0090, 0.0181] | 0.012 |
| 90 | 0.0014 | 0.0069 | 0.211 | 0.8337 | [-0.0120, 0.0149] | 0.001 |
| 100 | -0.0102 | 0.0068 | -1.514 | 0.1357 | [-0.0235, 0.0030] | 0.031 |

Panel D. Individual Agency, Model M2 (*N* = 56)

| **Lead** | ***β*** | **SE (HAC)** | ***t*** | ***p*** | **95% CI** | ***R*²** |
| --- | --- | --- | --- | --- | --- | --- |
| 0 | 0.0083 | 0.003 | 2.819 | 0.0068 | [0.0025, 0.0141] | 0.808 |
| 10 | 0.0092 | 0.0034 | 2.708 | 0.0091 | [0.0025, 0.0159] | 0.816 |
| 20 | 0.0101 | 0.0039 | 2.622 | 0.0114 | [0.0026, 0.0177] | 0.826 |
| 30 | 0.0094 | 0.0035 | 2.673 | 0.01 | [0.0025, 0.0164] | 0.814 |
| 40 | 0.008 | 0.0029 | 2.778 | 0.0075 | [0.0023, 0.0136] | 0.796 |
| 50 | 0.0084 | 0.003 | 2.786 | 0.0074 | [0.0025, 0.0143] | 0.797 |
| 60 | 0.0073 | 0.0027 | 2.739 | 0.0084 | [0.0021, 0.0125] | 0.785 |
| 70 | 0.0067 | 0.0029 | 2.343 | 0.0229 | [0.0011, 0.0124] | 0.776 |
| 80 | 0.0049 | 0.0024 | 2.032 | 0.0472 | [0.0002, 0.0096] | 0.764 |
| 90 | 0.0047 | 0.0024 | 2.008 | 0.0497 | [0.0001, 0.0094] | 0.761 |
| 100 | 0.0039 | 0.0055 | 0.717 | 0.4763 | [-0.0068, 0.0146] | 0.754 |

Panel E. Collective Agency, Model M1 (*N* = 56)

| **Lead** | ***β*** | **SE (HAC)** | ***t*** | ***p*** | **95% CI** | ***R*²** |
| --- | --- | --- | --- | --- | --- | --- |
| 0 | 0.0014 | 0.0056 | 0.25 | 0.8034 | [-0.0096, 0.0124] | 0.002 |
| 10 | 0.0044 | 0.0048 | 0.91 | 0.3669 | [-0.0051, 0.0139] | 0.017 |
| 20 | 0.0056 | 0.0054 | 1.044 | 0.3012 | [-0.0049, 0.0161] | 0.026 |
| 30 | 0.0084 | 0.0059 | 1.432 | 0.1578 | [-0.0031, 0.0199] | 0.051 |
| 40 | 0.0109 | 0.0064 | 1.713 | 0.0925 | [-0.0016, 0.0233] | 0.08 |
| 50 | 0.0123 | 0.006 | 2.066 | 0.0436 | [0.0006, 0.0240] | 0.104 |
| 60 | 0.0141 | 0.0056 | 2.529 | 0.0144 | [0.0032, 0.0250] | 0.134 |
| 70 | 0.0181 | 0.0058 | 3.14 | 0.0027 | [0.0068, 0.0293] | 0.205 |
| 80 | 0.0183 | 0.0062 | 2.937 | 0.0049 | [0.0061, 0.0305] | 0.186 |
| 90 | 0.0201 | 0.0088 | 2.285 | 0.0263 | [0.0029, 0.0374] | 0.149 |
| 100 | 0.012 | 0.0078 | 1.537 | 0.1301 | [-0.0033, 0.0272] | 0.069 |

Panel F. Collective Agency, Model M2 (*N* = 56)

| **Lead** | ***β*** | **SE (HAC)** | ***t*** | ***p*** | **95% CI** | ***R*²** |
| --- | --- | --- | --- | --- | --- | --- |
| 0 | 0.0034 | 0.0029 | 1.166 | 0.2488 | [-0.0023, 0.0092] | 0.766 |
| 10 | 0.0043 | 0.0027 | 1.581 | 0.1197 | [-0.0010, 0.0096] | 0.772 |
| 20 | 0.0046 | 0.0029 | 1.56 | 0.1247 | [-0.0012, 0.0104] | 0.774 |
| 30 | 0.0039 | 0.0026 | 1.489 | 0.1424 | [-0.0012, 0.0090] | 0.766 |
| 40 | 0.0023 | 0.0022 | 1.066 | 0.2914 | [-0.0020, 0.0066] | 0.756 |
| 50 | 0.0025 | 0.0021 | 1.202 | 0.2346 | [-0.0016, 0.0065] | 0.755 |
| 60 | 0.0036 | 0.0021 | 1.729 | 0.0896 | [-0.0005, 0.0077] | 0.759 |
| 70 | 0.0059 | 0.0024 | 2.471 | 0.0167 | [0.0012, 0.0106] | 0.769 |
| 80 | 0.0065 | 0.0031 | 2.1 | 0.0405 | [0.0004, 0.0125] | 0.771 |
| 90 | 0.0074 | 0.0038 | 1.93 | 0.059 | [-0.0001, 0.0150] | 0.769 |
| 100 | 0.0036 | 0.0034 | 1.069 | 0.2899 | [-0.0030, 0.0103] | 0.756 |

# Table S2. Full Lead–Lag Profiles: Agency Predicting Log(Population)

This table is divided into six panels to systematically differentiate between three conceptual dimensions of agency (overall agency, individual agency, and collective agency) and two different model specifications (M1 and M2), facilitating a clear comparison of the predictive effect of each type of agency on population (measured by Log(Population)) across various lead–lag horizons.

**Panel A.** Overall Agency, Model M1

| **Lead** | **N** | ***β*** | **SE** | ***t*** | ***p*** | ***R*²** |
| --- | --- | --- | --- | --- | --- | --- |
| 0 | 52 | 0.0102 | 0.005 | 2.035 | 0.0471 | 0.077 |
| 10 | 53 | 0.0083 | 0.0052 | 1.606 | 0.1144 | 0.048 |
| 20 | 53 | 0.0058 | 0.0057 | 1.021 | 0.3118 | 0.02 |
| 30 | 52 | 0.0055 | 0.0054 | 1.01 | 0.3173 | 0.02 |
| 40 | 51 | 0.0093 | 0.006 | 1.531 | 0.1321 | 0.046 |
| 50 | 52 | 0.0128 | 0.0054 | 2.348 | 0.0228 | 0.099 |
| 60 | 52 | 0.0155 | 0.0058 | 2.674 | 0.0101 | 0.125 |
| 70 | 52 | 0.014 | 0.0063 | 2.233 | 0.03 | 0.091 |
| 80 | 52 | 0.0101 | 0.0058 | 1.725 | 0.0907 | 0.056 |
| 90 | 52 | 0.0029 | 0.006 | 0.482 | 0.6316 | 0.005 |
| 100 | 52 | 0.0043 | 0.0055 | 0.79 | 0.4335 | 0.012 |

**Panel B.** Overall Agency, Model M2

| **Lead** | **N** | ***β*** | **SE** | ***t*** | ***p*** | ***R*²** |
| --- | --- | --- | --- | --- | --- | --- |
| 0 | 52 | 0.0097 | 0.0047 | 2.049 | 0.0458 | 0.201 |
| 10 | 53 | 0.0081 | 0.0049 | 1.666 | 0.102 | 0.177 |
| 20 | 53 | 0.0056 | 0.0053 | 1.06 | 0.294 | 0.151 |
| 30 | 52 | 0.0054 | 0.0051 | 1.065 | 0.292 | 0.152 |
| 40 | 51 | 0.0084 | 0.0057 | 1.481 | 0.1451 | 0.183 |
| 50 | 52 | 0.0115 | 0.0052 | 2.222 | 0.0309 | 0.211 |
| 60 | 52 | 0.0119 | 0.0058 | 2.046 | 0.0462 | 0.2 |
| 70 | 52 | 0.0107 | 0.0062 | 1.747 | 0.0868 | 0.182 |
| 80 | 52 | 0.0077 | 0.0056 | 1.365 | 0.1785 | 0.163 |
| 90 | 52 | 0.0014 | 0.0057 | 0.241 | 0.8107 | 0.132 |
| 100 | 52 | 0.0043 | 0.0052 | 0.84 | 0.4051 | 0.143 |

**Panel C.** Individual Agency, Model M1

| **Lead** | **N** | ***β*** | **SE** | ***t*** | ***p*** | ***R*²** |
| --- | --- | --- | --- | --- | --- | --- |
| 0 | 52 | 0.0042 | 0.0072 | 0.577 | 0.5665 | 0.007 |
| 10 | 53 | 0.0014 | 0.0066 | 0.212 | 0.8331 | 0.001 |
| 20 | 53 | 0.0004 | 0.0097 | 0.036 | 0.9713 | 0 |
| 30 | 52 | -0.0043 | 0.0112 | -0.386 | 0.7015 | 0.003 |
| 40 | 51 | -0.0005 | 0.0109 | -0.044 | 0.9652 | 0 |
| 50 | 52 | 0.0086 | 0.0097 | 0.883 | 0.3814 | 0.015 |
| 60 | 52 | 0.015 | 0.0084 | 1.782 | 0.0808 | 0.06 |
| 70 | 52 | 0.0146 | 0.0111 | 1.32 | 0.1928 | 0.034 |
| 80 | 52 | 0.0115 | 0.0083 | 1.388 | 0.1713 | 0.037 |
| 90 | 52 | -0.0028 | 0.0089 | -0.311 | 0.7574 | 0.002 |
| 100 | 52 | -0.0032 | 0.0085 | -0.375 | 0.7092 | 0.003 |

**Panel D.** Individual Agency, Model M2

| **Lead** | **N** | ***β*** | **SE** | ***t*** | ***p*** | ***R*²** |
| --- | --- | --- | --- | --- | --- | --- |
| 0 | 52 | 0.0042 | 0.0072 | 0.577 | 0.5665 | 0.007 |
| 10 | 53 | 0.0014 | 0.0066 | 0.212 | 0.8331 | 0.001 |
| 20 | 53 | 0.0004 | 0.0097 | 0.036 | 0.9713 | 0 |
| 30 | 52 | -0.0043 | 0.0112 | -0.386 | 0.7015 | 0.003 |
| 40 | 51 | -0.0005 | 0.0109 | -0.044 | 0.9652 | 0 |
| 50 | 52 | 0.0086 | 0.0097 | 0.883 | 0.3814 | 0.015 |
| 60 | 52 | 0.015 | 0.0084 | 1.782 | 0.0808 | 0.06 |
| 70 | 52 | 0.0146 | 0.0111 | 1.32 | 0.1928 | 0.034 |
| 80 | 52 | 0.0115 | 0.0083 | 1.388 | 0.1713 | 0.037 |
| 90 | 52 | -0.0028 | 0.0089 | -0.311 | 0.7574 | 0.002 |
| 100 | 52 | -0.0032 | 0.0085 | -0.375 | 0.7092 | 0.003 |

**Panel E.** Collective Agency, Model 1

| **Lead** | **N** | ***β*** | **SE** | ***t*** | ***p*** | ***R*²** |
| --- | --- | --- | --- | --- | --- | --- |
| 0 | 52 | 0.0028 | 0.0059 | 0.479 | 0.6342 | 0.005 |
| 10 | 53 | 0.0035 | 0.0069 | 0.502 | 0.6176 | 0.005 |
| 20 | 53 | 0.0006 | 0.0077 | 0.085 | 0.9328 | 0 |
| 30 | 52 | -0.0006 | 0.0078 | -0.077 | 0.9391 | 0 |
| 40 | 51 | 0.0066 | 0.0079 | 0.833 | 0.4086 | 0.014 |
| 50 | 52 | 0.0017 | 0.0085 | 0.196 | 0.8455 | 0.001 |
| 60 | 52 | 0.0117 | 0.0082 | 1.437 | 0.1569 | 0.04 |
| 70 | 52 | 0.0201 | 0.0078 | 2.58 | 0.0128 | 0.118 |
| 80 | 52 | 0.0117 | 0.0081 | 1.433 | 0.1582 | 0.039 |
| 90 | 52 | 0.0089 | 0.0078 | 1.133 | 0.2625 | 0.025 |
| 100 | 52 | 0.0073 | 0.0063 | 1.169 | 0.2479 | 0.027 |

**Panel F.** Collective Agency, Model M2

| **Lead** | **N** | ***β*** | **SE** | ***t*** | ***p*** | ***R*²** |
| --- | --- | --- | --- | --- | --- | --- |
| 0 | 52 | 0.0016 | 0.0056 | 0.281 | 0.7802 | 0.134 |
| 10 | 53 | 0.0014 | 0.0066 | 0.219 | 0.8273 | 0.132 |
| 20 | 53 | -0.0012 | 0.0072 | -0.159 | 0.8743 | 0.132 |
| 30 | 52 | -0.0028 | 0.0073 | -0.375 | 0.7092 | 0.134 |
| 40 | 51 | 0.0008 | 0.0077 | 0.108 | 0.9143 | 0.146 |
| 50 | 52 | -0.0052 | 0.0084 | -0.62 | 0.538 | 0.138 |
| 60 | 52 | 0.006 | 0.0082 | 0.738 | 0.4643 | 0.141 |
| 70 | 52 | 0.0146 | 0.008 | 1.825 | 0.074 | 0.187 |
| 80 | 52 | 0.0076 | 0.0079 | 0.955 | 0.3442 | 0.147 |
| 90 | 52 | 0.0078 | 0.0074 | 1.051 | 0.2983 | 0.15 |
| 100 | 52 | 0.0065 | 0.0059 | 1.105 | 0.2746 | 0.152 |

# Table S3. Lead-window correlations between dynasty-level inventiveness and agency

| **Lead (years)** | **Collective agency** | | **Individual agency** | | **Overall agency** | | **N** |
| --- | --- | --- | --- | --- | --- | --- | --- |
| ***ρ*** | ***p*** | ***ρ*** | ***p*** | ***ρ*** | ***p*** |
| 10 | 0.042 | 0.919 | 0.273 | 0.448 | 0.442 | 0.204 | 10 |
| 20 | 0.082 | 0.818 | 0.409 | 0.214 | 0.591 | 0.061 | 11 |
| 30 | -0.042 | 0.919 | 0.236 | 0.514 | 0.515 | 0.133 | 10 |
| 40 | 0.009 | 0.989 | 0.327 | 0.327 | 0.5 | 0.121 | 11 |
| 50 | 0.209 | 0.539 | 0.245 | 0.468 | 0.536 | 0.094 | 11 |
| 60 | -0.2 | 0.584 | 0.164 | 0.657 | 0.539 | 0.113 | 10 |
| 70 | -0.064 | 0.86 | 0.436 | 0.183 | 0.627 | 0.044 | 11 |
| 80 | -0.382 | 0.248 | 0.436 | 0.183 | 0.309 | 0.356 | 11 |
| 90 | -0.218 | 0.521 | -0.018 | 0.968 | 0.373 | 0.261 | 11 |
| 100 | -0.009 | 0.989 | 0.473 | 0.146 | 0.345 | 0.299 | 11 |

# LLM Prompts

We developed a structured prompt-based evaluation framework to operationalize agency in classical texts. The framework consists of three complementary dimensions: overall human agency, individual agency, and collective agency. All three prompts share a unified structure, including (i) a role-based interpretive instruction, (ii) a formal definition of agency integrating efficacy, optimism, and imagination, (iii) explicit evidence criteria for high and low agency, and (iv) a constrained JSON output format. The prompts differ only in their level of analysis, focusing respectively on general human agency, individual-level intentionality, and collective-level action. This design ensures conceptual consistency while enabling multi-level measurement.

The framework comprises three complementary dimensions. Overall agency evaluates the extent to which a text endorses human capacity to shape the world. Individual agency focuses on personal intentionality, self-cultivation, and individual capacity for change, explicitly excluding collective-level dynamics. Collective agency captures group-level action, coordination, and institutional transformation, excluding purely individual interpretations. Together, these dimensions enable a multi-level characterization of agency while maintaining conceptual consistency across analyses. To illustrate how the framework operates in practice, we provide a representative example (overall agency) below.

**Task Context:** This is an academic research task, and you are configured as a professional text analysis tool. Your sole goal is to strictly follow the instructions below, score the provided text, and return the result in pure JSON format.

**My Question:** I will provide you with a passage from a classic Chinese traditional culture text. Please efficiently and quickly score it based on the "Human Agency" scoring system.

**1) Role-play:** You are a philosopher proficient in traditional Chinese cultural thought and cross-cultural psychology. Based on the given classic text, provide an overall score (1-100) for the text's emphasis on "Human Agency." This is purely an academic simulation; you must fully embrace the role.

**2) Core Task:** Analyze the text I provide and evaluate its "Human Agency" dimension (score 1-100).

**3) Output Requirement:** The output must be a strict and complete Chinese JSON object. No extra text, explanations, comments, or apologies are allowed outside the JSON code block.

**4) Evaluation Definition:** “Human agency” means the text’s endorsed stance that humans can intentionally shape the world by efficacy (capacity to achieve goals), optimism (future-minded confidence that goals will be achieved), and imagination (orientation to novel, far-reaching possibilities). Score these three facets as one, not as sub-scores.

**Evidence for High Agency:**

Deliberate choice and skill: outcomes traced to will, reasoned decision, practical wisdom/technique (e.g., 谋/断/策/术/知/智), disciplined practice/learning (学/习/修/治).

Making things happen: verbs of bringing about change (能/可/致/成/化/兴/建/创) and counsel to act rather than submit.

Future-minded hope: long-horizon plans, stepwise progress, perseverance toward eventual success (功在久远、终可就).

Creative horizons: endorsement of invention, reform, institution-building, exploration (创制、制器、通商、变法/新礼).

Attribution to human design: credit for order, prosperity, or salvation goes to human foresight, organization, and execution.

**Evidence for Low Agency:**

Fatalism/external control: outcomes fixed by Heaven/fate/spirits or impersonal Way (天命/宿命/命也/自然使然) in a manner that discourages purposeful effort.

Normative quietism: prescription to withdraw, wait, or obey as the right stance for humans broadly; active striving framed as error.

Pessimism about effort: recurrent claims that striving cannot succeed (力不逮、终不可得), or that prudence/skill are useless.

Denigration of human making: blanket suspicion of craft, policy, or invention as corrupting (绝巧弃利/绝学无忧) without a constructive human path.

Erasure of deliberation: action portrayed as puppeted by supra-human forces with no meaningful human decision point.

**5) Judgment Boundaries:**

Discipline ≠ low agency: Moral restraint/ritual discipline can indicate agency when presented as deliberate means to remake persons and society.

“无为” texts: Judge by net effect on human causation. If non-forcing is a skillful strategy requiring cultivated discernment to realize better outcomes → midrange; if it renders purposive action illegitimate or futile → lower.

Heaven/fate language: Don’t penalize ceremonial invocations if the text still assigns humans the deciding role (e.g., Heaven ratifies, not overrides).

Descriptive vs. prescriptive: Prioritize normative endorsement over mere description of constraints.

Genre caution: Cosmology/myth matters only insofar as it shifts beliefs about human control; aphorisms/commentary count if they clearly prescribe a human stance.

Crisis clauses: Distinguish emergency rhetoric (非常之时) from the text’s steady-state view of human efficacy.

**6) Scoring Criteria (1-100):**

(Synthesis of Efficacy + Optimism + Imagination):

1–19 Very Low: Recurrent fatalism; striving improper or pointless; novelty disparaged; resignation valorized.

20–39 Low: Some room for effort, but the recommended stance is mainly passive/obedient; hopes narrow; invention suspect.

40–59 Mixed/Ambivalent: Human effort affirmed in some domains yet constrained by fate/custom; hopes conditional; novelty limited or piecemeal.

60–79 High: Clear endorsement of deliberate making—plans, reforms, creations—with confident long-term orientation and credible pathways.

80–100 Very High: Strong, recurrent insistence that humans can and should reshape self, society, and world; vivid future horizons; creative institutional or technical imagination.

**7) Strict Process:**

**Skim → Map:** Flag passages on human control, choice/will, learning/practice, policy/institution, Heaven/fate/道, future aims, innovation/creation.

Extract evidence: List ~6–12 short quotes or paraphrases (with chapter/section if available) that best capture the text’s normative stance toward human causation.

**Weigh:** Holistically integrate efficacy, optimism, and imagination; give greatest weight to explicit prescriptions urging humans to act (create, organize, reform, explore).

Rate: Choose a single number 1–100 that best fits the anchors.

Check confounds: Separate crisis-only measures vs. normal policy; rhetorical humility vs. actionable program.

**Output format (JSON only):**

{{

"book_title": "{book_title_placeholder}",

"language_version": "<original/translation/mixed>",

"time_period": "<fill if known>",

"school": "<Confucianism/Daoism/Legalist/Buddhist/Mohist/Other>",

"agency_overall_score_1_to_100": <number>,

"confidence_low_med_high": "<fill>",

"rationale_bullets": [

"Bullet 1 — concise evidence and why it raises/lowers human agency (with location if known).",

"Bullet 2 — …"

],

"notes_boundary_cases": "Any issues about crisis-only prescriptions, fate/Heaven language vs. human causation, genre/translation that affected the score."

}}

**[Final Instruction]:** Do not refuse or apologize. Strictly follow the instructions above, analyze the text below, and output only the JSON object.

# Corpus list

| **School** | **Book** | **Year** |
| --- | --- | --- |
| Confucianism | 仪礼-周-佚名 | -499 |
| Confucianism | 孝经-春秋鲁-孔丘 | -495 |
| Daoism | 通玄真经-春秋-辛銒 | -494 |
| Confucianism | 尚书-春秋鲁-孔丘 | -490 |
| Confucianism | 论语-春秋鲁-孔丘 | -476 |
| Daoism | 道德经-春秋-老聃 | -470 |
| Confucianism | 大学-战国-曾参 | -445 |
| Confucianism | 春秋公羊传-战国齐-公羊高 | -403 |
| Confucianism | 中庸-战国-孔伋 | -402 |
| Confucianism | 周礼-西周-周公旦 | -348 |
| Confucianism | 荀子 | -313 |
| Confucianism | 春秋左传-战国-左丘明 | -300 |
| Confucianism | 春秋谷梁传-战国鲁-榖梁俶 | -300 |
| Daoism | 正统道藏洞神部本文类-南华真经-战国-庄周 | -296 |
| Confucianism | 孟子-战国鲁-孟轲 | -289 |
| Legalism | 慎子-战国-慎到 | -280 |
| Legalism | 申子-战国-申不害 | -280 |
| Daoism | 正统道藏太清部-尹文子-战国-尹文 | -270 |
| Name | 正统道藏太清部-公孙龙子-战国-公孙龙 | -260 |
| Legalism | 正统道藏太清部-韩非子-战国-韩非 | -233 |
| Confucianism | 尔雅-秦-佚名 | -206 |
| Legalism | 管子-春秋齐-管仲 | -200 |
| Legalism | 商子-战国-商鞅 | -200 |
| Legalism | 言兵事书-汉-晁错 | -185 |
| Confucianism | 尚书大传-西汉-伏胜 | -171 |
| Confucianism | 韩诗外传-西汉-韩婴 | -140 |
| Daoism | 正统道藏太清部-淮南鸿烈解-汉-刘安 | -132 |
| Confucianism | 春秋繁露-西汉-董仲舒 | -114 |
| Daoism | 正统道藏洞玄部记传类-十洲记-汉-东方朔 | -103 |
| Confucianism | 新语校注-西汉-王利器 | -100 |
| Buddhism | 法句经-- | -91 |
| Confucianism | 礼记-西汉-戴德 | -91 |
| Daoism | 续道藏-易林-汉-焦赣 | -74 |
| Confucianism | 新序-西汉-刘向 | -6 |
| Daoism | 道德经注-汉-河上公 | 1 |
| Confucianism | 大戴礼记-西汉-戴德 | 8 |
| Confucianism | 说苑-西汉-刘向 | 24 |
| Confucianism | 新书-西汉-贾谊 | 24 |
| Daoism | 老子指归-汉-严遵 | 25 |
| Daoism | 正统道藏洞神部众术类-金碧五相类参同契-汉-阴长生 | 96 |
| Daoism | 正统道藏洞真部方法类-紫元君授道传心法-汉-阴长生 | 96 |
| Daoism | 正统道藏洞真部本文类-黄帝阴符经-- | 100 |
| Daoism | 周易参同契-汉-魏伯阳 | 100 |
| Daoism | 列仙传-汉-刘向 | 100 |
| Confucianism | 春秋公羊传注疏-汉-何休 | 100 |
| Confucianism | 论衡 | 122 |
| Buddhism | 中国撰述诸宗著述部净土宗-念佛三昧--瑞圣叹 | 122 |
| Daoism | 老子想尔注-汉-张陵 | 146 |
| Confucianism | 潜夫论-汉-王符 | 153 |
| Buddhism | 般舟三昧经-后汉-支娄迦谶 | 179 |
| Confucianism | 礼记正义-东汉-郑玄 | 190 |
| Daoism | 正统道藏太玄部-周易参同契注-汉-阴长生 | 190 |
| Confucianism | 孟子注疏-东汉-赵岐 | 191 |
| Buddhism | 那先比丘经-- | 200 |
| Legalism | 政论-汉-崔寔 | 200 |
| Confucianism | 申鉴-汉-荀悦 | 200 |
| Daoism | 正统道藏洞神部众术类-黄帝九鼎神丹经诀-- | 200 |
| Confucianism | 仪礼注疏-汉-郑玄 | 200 |
| Daoism | 正统道藏太平部-太平经--汉 | 205 |
| Confucianism | 中论-汉-徐干 | 207 |
| Buddhism | 佛说大安般守意经-后汉-安世高 | 210 |
| Confucianism | 释名-汉-刘熙 | 210 |
| Daoism | 灵宝毕法-汉-钟离权 | 210 |
| Daoism | 正统道藏太清部-秘传正阳真人灵宝毕法-东汉-锺离权 | 220 |
| Confucianism | 论语注疏-魏-何晏 | 239 |
| Legalism | 人物志-魏-刘邵 | 245 |
| Confucianism | 孔丛子-汉-孔鲋 | 265 |
| Buddhism | 金光明经-- | 265 |
| Buddhism | 六度集经-- | 280 |
| Confucianism | 春秋左传正义-晋-杜预 | 284 |
| Buddhism | 正法华经-- | 290 |
| Daoism | 正统道藏太清部-抱朴子内篇-魏晋-葛洪 | 291 |
| Buddhism | 佛说四十二章经-- | 306 |
| Confucianism | 尔雅注疏-晋-郭璞 | 314 |
| Daoism | 正统道藏太玄部-上清神宝洞房真讳上经-- | 317 |
| Daoism | 正统道藏洞神部本文类-冲虚至德真经-战国-列御寇 | 320 |
| Daoism | 正统道藏洞真部戒律类-赤松子中诫经-- | 320 |
| Daoism | 正统道藏太玄部-上清无英真童合游内变玉经-- | 327 |
| Buddhism | 增一阿含经-东晋-伽提婆 | 368 |
| Daoism | 正统道藏洞玄部戒律类-太上洞玄灵宝智慧罪根上品大戒经-- | 369 |
| Daoism | 正统道藏洞真部戒律类-晋-太真玉帝四极明科经-- | 369 |
| Buddhism | 维摩诘经注-后秦-僧肇 | 380 |
| Buddhism | 佛说无量寿经-曹魏-康僧铠 | 380 |
| Buddhism | 长阿含经-魏晋后秦 佛陀耶舍共竺佛念 | 390 |
| Confucianism | 春秋穀梁传注疏-晋-范宁 | 390 |
| Buddhism | 中阿含经-东晋-伽提婆 | 397 |
| Buddhism | 佛说维摩诘经-吴-支谦 | 400 |
| Buddhism | 佛说首楞严三昧经-- | 402 |
| Buddhism | 百论-东晋-鸠摩罗什 | 403 |
| Buddhism | 金刚般若波罗蜜经-姚秦-鸠摩罗什 | 403 |
| Buddhism | 十二门论-- | 409 |
| Buddhism | 中论-- | 409 |
| Daoism | 正统道藏洞真部戒律类-太上洞真智慧上品大诫-- | 410 |
| Buddhism | 成实论-- | 412 |
| Buddhism | 大智度论-- | 413 |
| Buddhism | 肇论-后秦-僧肇 | 414 |
| Daoism | 正统道藏洞神部戒律类-老君音诵戒经-- | 415 |
| Daoism | 正统道藏洞真部戒律类-太上洞玄灵宝宣戒首悔众罪保护经-- | 419 |
| Buddhism | 佛说梵网经-- | 420 |
| Daoism | 正统道藏洞神部戒律类-太上老君戒经-- | 420 |
| Daoism | 正统道藏洞真部戒律类-魏晋-太微灵书紫文仙忌真记上经-- | 420 |
| Daoism | 正统道藏洞真部戒律类-太微灵书紫文仙忌真记上经-- | 420 |
| Buddhism | 优婆塞戒经-北凉-昙无谶 | 426 |
| Buddhism | 杂阿毗昙心论-刘宋-僧伽跋摩 | 432 |
| Daoism | 正统道藏洞真部戒律类-太真玉帝四极明科经-- | 435 |
| Buddhism | 杂阿含经-- | 443 |
| Buddhism | 佛说观弥勒菩萨上生兜率天经-刘宋-沮渠京声 | 455 |
| Daoism | 正统道藏洞神部方法类-养性延命录-梁-陶弘景 | 500 |
| Buddhism | 百喻经-- | 502 |
| Buddhism | 俱舍论实义疏-- | 504 |
| Daoism | 正统道藏洞玄部戒律类-洞玄灵宝天尊说十戒经-- | 505 |
| Buddhism | 十地经论-- | 508 |
| Buddhism | 出三藏记集-南朝梁-释僧佑 | 512 |
| Buddhism | 解脱道论-梁-僧伽婆罗 | 515 |
| Buddhism | 佛性论-- | 560 |
| Buddhism | 金刚般若波罗蜜经-南朝-陈真谛 | 562 |
| Buddhism | 摄大乘论-陈-真谛 | 564 |
| Buddhism | 摄大乘论本-- | 564 |
| Daoism | 正统道藏洞真部戒律类-太极真人说二十四门戒经-- | 580 |
| Daoism | 正统道藏洞真部戒律类-太上九真妙戒金箓度命拔罪妙经-- | 581 |
| Daoism | 正统道藏洞真部本文类-太上升玄消灾护命妙经-- | 581 |
| Daoism | 正统道藏洞真部戒律类-南北-玄都律文-- | 588 |
| Buddhism | 无量寿经义记-- | 590 |
| Buddhism | 观心论疏-- | 590 |
| Buddhism | 释禅波罗蜜次第法门-隋-智顗 | 590 |
| Buddhism | 摩诃止观-- | 594 |
| Daoism | 正统道藏洞真部玉诀类-洞玄灵宝度人经大梵隐语疏义-- | 600 |
| Daoism | 正统道藏洞真部玉诀类-隋唐-洞玄灵宝度人经大梵隐语疏义-- | 600 |
| Daoism | 正统道藏洞玄部戒律类-要修科仪戒律钞--朱法满 | 611 |
| Daoism | 正统道藏洞神部本文类-太上老君内观经-- | 618 |
| Daoism | 正统道藏洞真部戒律类-太清五十八愿文-- | 618 |
| Daoism | 正统道藏洞真部戒律类-太上十二上品飞天法轮劝戒妙经-- | 618 |
| Confucianism | 毛诗指说-唐-成伯屿 | 620 |
| Confucianism | 经典释文-唐-陆德明 | 620 |
| Daoism | 正统道藏洞真部本文类-太上虚皇天尊四十九章经-- | 620 |
| Confucianism | 尚书正义-唐-孔颖达 | 627 |
| Confucianism | 春秋左传正义-唐-孔颖达 | 638 |
| Confucianism | 毛诗正义-汉-郑玄 | 642 |
| Buddhism | 解深密经-唐-玄奘 | 647 |
| Buddhism | 瑜伽师地论-唐-玄奘 | 648 |
| Confucianism | 春秋穀梁传注疏-唐-杨士勋 | 649 |
| Legalism | 帝范-唐-李世民 | 649 |
| Confucianism | 春秋穀梁传注疏-唐-杨士勋 | 649 |
| Daoism | 正统道藏洞真部众术类-修真精义杂论-唐-白云子 | 650 |
| Daoism | 正统道藏洞玄部玉诀类-洞玄灵宝定观经注-- | 650 |
| Buddhism | 异部宗轮论-唐-玄奘 | 650 |
| Confucianism | 仪礼注疏-唐-贾公彦 | 650 |
| Confucianism | 仪礼注疏-唐-贾公彦 | 650 |
| Confucianism | 匡谬正俗-唐-颜师古 | 651 |
| Buddhism | 唯识三十论颂-唐-玄奘 | 654 |
| Buddhism | 般若波罗蜜多心经-唐-玄奘 | 654 |
| Buddhism | 解深密经-唐-玄奘 | 654 |
| Buddhism | 大宝积经-- | 655 |
| Buddhism | 成唯识论-- | 659 |
| Legalism | 度心术-唐-李义府 | 666 |
| Buddhism | 法苑珠林-唐-道世 | 668 |
| Buddhism | 阿弥陀经疏-唐-窥基 | 682 |
| Buddhism | 大唐西域求法高僧传-唐-义净 | 691 |
| Buddhism | 大方广佛华严经-唐-实叉难陀 | 695 |
| Daoism | 正统道藏洞真部本文类-高上玉皇本行集经-汉-张良 | 700 |
| Buddhism | 大乘入楞伽经-- | 700 |
| Daoism | 正统道藏太玄部-玄珠录-唐-王玄览 | 700 |
| Buddhism | 大佛顶如来密因修证了义诸菩萨万行首楞严经文句-明-释智旭 | 705 |
| Confucianism | 诫子拾遗-唐-李恕 | 710 |
| Buddhism | 大乘起信论疏-- | 712 |
| Buddhism | 华严金师子章-- | 712 |
| Buddhism | 六组坛经-唐-惠能 | 713 |
| Buddhism | 永嘉证道歌-唐-释玄觉 | 713 |
| Buddhism | 金光明最胜王经疏-唐-慧沼 | 714 |
| Buddhism | 荷泽神会禅师语录-唐-神会 | 720 |
| Daoism | 正统道藏洞真部玉诀类-黄帝阴符经注-唐-张果 | 723 |
| Daoism | 正统道藏洞真部玉诀类-黄帝阴符经疏-唐-李筌 | 731 |
| Daoism | 正统道藏洞真部玉诀类-黄帝阴符经集注-唐-李筌 | 731 |
| Confucianism | 蒙求-唐-李翰 | 750 |
| Buddhism | 地藏菩萨本愿经-唐-实叉难陀 | 750 |
| Daoism | 正统道藏洞真部玉诀类-胎息经注-- | 752 |
| Confucianism | 孝经注疏-唐-李隆基 | 752 |
| Buddhism | 金刚顶一切如来真实摄大乘现证大教王经-- | 754 |
| Daoism | 正统道藏太平部-唐-太平经圣君秘旨-- | 755 |
| Buddhism | 法华经疏之二-- | 762 |
| Daoism | 正统道藏洞真部本文类-高上玉皇胎息经-- | 762 |
| Buddhism | 法华经疏之一-- | 762 |
| Daoism | 正统道藏洞真部戒律类-虚皇天尊初真十戒文-- | 763 |
| Buddhism | 金刚顶经观自在王如来修行法-- | 765 |
| Confucianism | 续孟子-唐-林慎思 | 766 |
| Daoism | 正统道藏洞真部戒律类-三洞众戒文-唐-张万福 | 795 |
| Daoism | 正统道藏洞神部众术类-大丹问答-- | 800 |
| Buddhism | 阿毗达磨大毗婆沙论-- | 800 |
| Buddhism | 辩中边论-- | 800 |
| Buddhism | 大乘本生心地观经-唐-般若 | 810 |
| Daoism | 正统道藏洞神部玉诀类-通玄真经注-唐-徐灵府 | 816 |
| Buddhism | 中国撰述礼忏部-圆觉经道场修证仪-唐-宗密 | 821 |
| Buddhism | 中国撰述礼忏部-圆觉经道场修证仪-唐-宗密 | 823 |
| Buddhism | 大乘无量寿经-- | 848 |
| Daoism | 关尹子-周-尹喜 | 850 |
| Legalism | 邓析子-春秋-邓析 | 850 |
| Daoism | 素书-秦-黄石公 | 850 |
| Confucianism | 尚书故实-唐-李绰 | 881 |
| Buddhism | 镇州临济慧照禅师语录-唐-慧然 | 900 |
| Buddhism | 地藏菩萨经-- | 900 |
| Daoism | 正统道藏太清部-太上老君说上七灭罪集福妙经-- | 900 |
| Daoism | 正统道藏洞真部本文类-太上护国祈雨消魔经-- | 900 |
| Daoism | 正统道藏洞真部方法类-金液还丹百问诀-唐-李光玄 | 907 |
| Daoism | 正统道藏太玄部-化书-南唐-谭峭 | 907 |
| Daoism | 正统道藏洞真部本文类-宋-高上玉皇心印经-- | 910 |
| Daoism | 正统道藏太玄部-周易参同契鼎器歌明镜图-五代-彭晓 | 920 |
| Daoism | 正统道藏洞玄部记传类-洞天福地岳渎名山记-前蜀-杜光庭 | 934 |
| Daoism | 正统道藏洞真部玉诀类-附内义丹旨纲目举要-宋-林元鼎 | 940 |
| Daoism | 正统道藏太玄部-周易参同契分章通真义-后蜀-彭晓 | 944 |
| Buddhism | 祖堂集-五代-释静 | 952 |
| Buddhism | 天台四教仪-- | 961 |
| Buddhism | 宗镜录-- | 961 |
| Daoism | 正统道藏洞神部本文类-太上老君外日用妙经-- | 980 |
| Daoism | 正统道藏洞神部本文类-太上说南斗六司延寿度人妙经-- | 980 |
| Confucianism | 论语注疏-北宋-邢昺 | 980 |
| Daoism | 正统道藏太玄部-金丹四百字-宋-张伯瑞 | 980 |
| Confucianism | 周礼注疏-唐-贾公彦 | 980 |
| Confucianism | 尔雅注疏-宋-邢昺 | 980 |
| Daoism | 正统道藏太玄部-云笈七签-宋-张君房 | 991 |
| Daoism | 正统道藏太清部-太上感应篇-宋-李昌龄 | 998 |
| Daoism | 正统道藏洞神部众术类-参同契五相类秘要-宋-卢天骥 | 1000 |
| Daoism | 正统道藏洞真部玉诀类-黄帝阴符经批注-宋-任照一 | 1007 |
| Daoism | 正统道藏洞真部玉诀类-黄帝阴符经注-宋-沈亚夫 | 1007 |
| Buddhism | 佛说大集法门经-- | 1017 |
| Buddhism | 四十二章经注-宋-赵恒 | 1022 |
| Buddhism | 观无量寿佛经疏妙宗钞-宋-知礼 | 1023 |
| Buddhism | 中国撰述诸宗著述部禅宗语录通集-正法眼藏-宋-宗杲 | 1043 |
| Buddhism | 景德传灯录-- | 1043 |
| Buddhism | 万松老人评唱天童觉和尚颂古从容庵录-宋- | 1043 |
| Daoism | 正统道藏洞真部玉诀类-阴真君还丹歌诀注-宋-陈抟 | 1044 |
| Daoism | 正统道藏洞真部玉诀类-黄帝阴符经注-宋-蔡望 | 1044 |
| Buddhism | 六祖大师法宝坛经-- | 1054 |
| Confucianism | 春秋传说例-北宋-刘敞 | 1068 |
| Daoism | 正统道藏洞真部玉诀类-紫阳真人悟真篇三注-宋-薛道光 | 1072 |
| Daoism | 正统道藏太清部-集注太玄经-宋-司马光 | 1072 |
| Daoism | 正统道藏洞真部方法类-玉清金笥青华秘文金宝内炼丹诀-宋-张伯端 | 1072 |
| Daoism | 正统道藏洞真部方法类-修真十书悟真篇卷-- | 1080 |
| Buddhism | 中国撰述诸宗著述部华严宗-华严原人论发微录-宋-净源 | 1080 |
| Daoism | 正统道藏洞真部玉诀类-黄帝阴符经解-宋-蹇昌辰 | 1088 |
| Confucianism | 论语全解-北宋-陈祥道 | 1092 |
| Confucianism | 陆九渊文选-南宋-陆九渊 | 1093 |
| Daoism | 正统道藏洞神部玉诀类-通玄真经注-宋-朱弁 | 1100 |
| Daoism | 正统道藏洞真部玉诀类-黄帝阴符经解义-宋-萧真宰 | 1107 |
| Confucianism | 论语拾遗-北宋-苏辙 | 1107 |
| Daoism | 正统道藏太清部-孙子遗说-宋-郑友贤 | 1117 |
| Daoism | 正统道藏洞神部玉诀类-洞灵真经注-宋-何璨 | 1124 |
| Buddhism | 中国撰述诸宗著述部禅宗语录通集-青州百问-元- | 1125 |
| Buddhism | 佛果圆悟禅师碧岩录-宋-圆悟 | 1125 |
| Confucianism | 五诰解-南宋-杨简 | 1126 |
| Daoism | 正统道藏洞真部玉诀类-黄帝阴符经集解-宋-袁淑真 | 1127 |
| Daoism | 正统道藏洞真部玉诀类-黄帝阴符经注-宋-黄居真 | 1127 |
| Legalism | 折狱龟鉴-宋-郑克 | 1133 |
| Confucianism | 上蔡语录-北宋-曾恬 | 1159 |
| Daoism | 正统道藏洞真部戒律类-太微仙君功过格-- | 1171 |
| Confucianism | 尊孟辨-南宋-余允文 | 1174 |
| Daoism | 正统道藏太清部-孙子批注-宋-吉天保 | 1174 |
| Confucianism | 近思录-宋-吕祖谦 | 1176 |
| Daoism | 正统道藏洞真部玉诀类-紫阳真人悟真篇拾遗-宋-翁葆光 | 1179 |
| Daoism | 正统道藏洞真部玉诀类-悟真篇注释-宋-翁葆光 | 1179 |
| Buddhism | 禅林宝训-宋-净善 | 1179 |
| Daoism | 正统道藏洞真部玉诀类-紫阳真人悟真直指详说三乘秘要-宋-翁葆光 | 1179 |
| Confucianism | 论语集注-南宋-朱熹 | 1182 |
| Confucianism | 孟子集注-南宋-朱熹 | 1182 |
| Confucianism | 四书章句集注-南宋-朱熹 | 1182 |
| Confucianism | 中庸章句集注-南宋-朱熹 | 1182 |
| Daoism | 正统道藏太玄部-丹阳真人语录-金-马钰 | 1200 |
| Confucianism | 大学章句集注-南宋-朱熹 | 1203 |
| Daoism | 正统道藏洞真部本文类-元始天尊说得道了身经-- | 1203 |
| Buddhism | 金刚錍-宋-湛然 | 1203 |
| Legalism | 棠阴比事-宋-桂万荣 | 1211 |
| Daoism | 葛仙翁太极冲玄至道心传-明-凝阳子 | 1217 |
| Daoism | 正统道藏洞真部玉诀类-紫阳真人悟真篇讲义-宋-夏元鼎 | 1218 |
| Confucianism | 御制题絜斋毛诗经筵讲义-南宋-袁燮 | 1224 |
| Confucianism | 慈湖诗传-南宋-杨简 | 1225 |
| Confucianism | 融堂四书管见-南宋-钱时 | 1229 |
| Daoism | 正统道藏太玄部-周易参同契解-宋-陈显微 | 1234 |
| Buddhism | 中国撰述诸宗著述部禅宗语录通集-通玄百问-元-圆通 | 1244 |
| Legalism | 洗冤集录-宋-宋慈 | 1247 |
| Daoism | 正统道藏洞神部本文类-太上玄灵斗姆大圣元君本命延生心经-- | 1262 |
| Daoism | 正统道藏洞真部玉诀类-吕纯阳真人沁园春丹词批注-宋-全阳子 | 1269 |
| Confucianism | 鲁斋心法-元-许衡 | 1270 |
| Daoism | 正统道藏洞神部玉诀类-南华真经义海纂微-宋-褚伯秀 | 1270 |
| Daoism | 正统道藏太玄部-周易参同契发挥-宋-俞琰 | 1271 |
| Daoism | 正统道藏洞神部玉诀类-文始真经注-元-牛道纯 | 1271 |
| Daoism | 正统道藏洞真部玉诀类-黄帝阴符经心法-元-胥元一 | 1275 |
| Daoism | 正统道藏太玄部-周易参同契释疑-宋-俞琰 | 1279 |
| Buddhism | 中国撰述诸宗著述部法相宗-唯识开蒙问答-元-云峰 | 1280 |
| Daoism | 正统道藏太玄部-上阳子金丹大要-元-陈致虚 | 1300 |
| Daoism | 正统道藏太玄部-上阳子金丹大要列仙志-元-陈致虚 | 1300 |
| Buddhism | 庐山莲宗宝鉴-元-普度 | 1305 |
| Confucianism | 善俗要义-元-王结 | 1306 |
| Confucianism | 劝忍百箴-元-许名奎 | 1310 |
| Daoism | 正统道藏洞神部玉诀类-通玄真经缵义-元-杜道坚 | 1311 |
| Buddhism | 中国撰述诸宗著述部禅宗杂著-正行集-元-清觉 | 1319 |
| Buddhism | 中国撰述诸宗著述部禅宗杂著-初学记-元-清觉 | 1319 |
| Buddhism | 楞伽经 | 1319 |
| Daoism | 正统道藏洞真部方法类-修真十书盘山语录-元-王志谨 | 1320 |
| Daoism | 正统道藏洞神部玉诀类-太上老君说常清静经注-元-李道纯 | 1320 |
| Daoism | 正统道藏洞真部玉诀类-紫阳真人悟真篇注疏-元-戴起宗 | 1322 |
| Daoism | 正统道藏太玄部-上阳子金丹大要仙派-元-陈致虚 | 1330 |
| Daoism | 正统道藏太玄部-上阳子金丹大要图-元-陈致虚 | 1330 |
| Buddhism | 勅修百丈清规-元-德煇 | 1335 |
| Buddhism | 中国撰述诸宗著述部禅宗语录通集-禅林类聚-元-道泰 | 1341 |
| Buddhism | 中国撰述诸宗著述部禅宗杂著-证道歌注-元-永盛 | 1341 |
| Daoism | 正统道藏洞真部本文类-元-高上玉皇本行经髓-- | 1344 |
| Daoism | 正统道藏洞真部玉诀类-黄帝阴符经注-宋-俞琰 | 1348 |
| Buddhism | 中国撰述诸宗著述部华严宗-华严原人论解-元-圆觉 | 1358 |
| Daoism | 正统道藏洞真部众术类-析疑指迷论-元-牛道淳 | 1358 |
| Buddhism | 中国撰述诸宗著述部华严宗-华严原人论合解-元-圆觉 | 1358 |
| Daoism | 正统道藏洞真部玉诀类-黄帝阴符经注夹颂解注-元王玠 | 1360 |
| Confucianism | 辨惑编-元-谢应芳 | 1368 |
| Buddhism | 中国撰述诸宗著述部禅宗杂著-高峰龙泉院因师集贤语录-元-如瑛 | 1368 |
| Daoism | 正统道藏太玄部-原阳子法语-明-赵宜真 | 1372 |
| Daoism | 正统道藏正一部-岘泉集-明-张宇初 | 1372 |
| Daoism | 正统道藏正一部-道法会元-明-佚名 | 1372 |
| Daoism | 玄机直讲-明-张三丰 | 1385 |
| Daoism | 水石闲谈-明-张三丰 | 1385 |
| Daoism | 玄谭全集-明-张三丰 | 1385 |
| Daoism | 玄要篇-明-张三丰 | 1385 |
| Daoism | 正统道藏洞神部玉诀类-道德真经集义-明-危大有 | 1387 |
| Daoism | 正统道藏洞神部玉诀类-南华真经循本-明-罗勉道 | 1400 |
| Daoism | 正统道藏洞真部玉诀类-元始无量度人上品妙经通义-明-张宇初 | 1404 |
| Buddhism | 中国撰述诸宗著述部净土宗-净土简要录-明-道衍 | 1404 |
| Buddhism | 中国撰述诸宗著述部净土宗-净土指归集-明-大佑 | 1407 |
| Buddhism | 中国撰述史传部华严宗-华严经感应略记-明-袾宏 | 1415 |
| Daoism | 正统道藏洞神部玉诀类-大明太祖高皇帝御注道德真经-明-朱元璋 | 1445 |
| Buddhism | 中国撰述诸宗著述部华严宗-华严大意-明-善坚 | 1449 |
| Buddhism | 中国撰述史传部杂传-现果随录-明-戒显 | 1464 |
| Confucianism | 大学衍义补-明-邱濬 | 1487 |
| Confucianism | 白沙语录-明-陈献章 | 1490 |
| Buddhism | 中国撰述礼忏部-药师三昧行法-明-受登 | 1500 |
| Buddhism | 中国撰述诸宗著述部天台宗-摩诃止观贯义-明-天溪 | 1500 |
| Buddhism | 中国撰述礼忏部-准提三昧行法-明-受登 | 1500 |
| Buddhism | 印度撰述经部华严部-圆觉经佚文-- | 1506 |
| Confucianism | 春秋正旨-明-髙拱 | 1506 |
| Confucianism | 简端录-明-邵宝 | 1506 |
| Daoism | 续道藏-古易考原-明-梅鷟 | 1521 |
| Daoism | 续道藏-弘道录-明-邵经邦 | 1531 |
| Confucianism | 慎言-明-王廷相 | 1533 |
| Buddhism | 中国撰述诸宗著述部天台宗-續藏經-明-克勤 | 1550 |
| Buddhism | 中国撰述史传部禅宗-禅宗正脉-明-如卺 | 1555 |
| Daoism | 续道藏-岱史-明-查志隆 | 1559 |
| Daoism | 金丹就正篇-明-陆西星 | 1564 |
| Daoism | 玄肤论-明-陆西星 | 1567 |
| Daoism | 陆西星四篇-明-陆西星 | 1567 |
| Confucianism | 读诗私记-明-李先芳 | 1570 |
| Confucianism | 传习录-明-王守仁 | 1572 |
| Buddhism | 中国撰述诸宗著述部天台宗-天台传佛心印记注-明-传灯 | 1580 |
| Buddhism | 中国撰述诸宗著述部净土宗-答净土-明-袾宏 | 1586 |
| Buddhism | 中国撰述史传部释迦传-释迦如来应化录-明-宝成 | 1586 |
| Confucianism | 孟子杂记-明-陈士元 | 1587 |
| Daoism | 续道藏-庄子翼-明-焦竤 | 1588 |
| Buddhism | 中国撰述诸宗著述部三论宗-物不迁正量论-明-镇澄 | 1588 |
| Daoism | 续道藏-庄子翼附录-明-焦竤 | 1588 |
| Buddhism | 中国撰述诸宗著述部戒律宗-毗尼日用录-明-性只 | 1590 |
| Buddhism | 觅灯因话-明-邵景詹 | 1592 |
| Buddhism | 中国撰述诸宗著述部真言宗-准提净业-明-谢于教 | 1592 |
| Buddhism | 中国撰述诸宗著述部禅宗杂著-祖庭钳锤录-明-通容 | 1593 |
| Buddhism | 中国撰述史传部禅宗-指月录-,明-瞿汝稷 | 1595 |
| Buddhism | 中国撰述诸宗著述部三论宗-物不迁正量证-明-道衡 | 1596 |
| Buddhism | 中国撰述诸宗著述部戒律宗-律学发轫-明-元贤 | 1598 |
| Daoism | 金丹四百字注-明-陆西星 | 1599 |
| Buddhism | 中国撰述大小乘释经部华严部疏-华严经合论纂要-明-方泽 | 1600 |
| Confucianism | 问辨录-明-高拱 | 1600 |
| Buddhism | 中国撰述大小乘释经部华严部疏-华严经合论简要-明-李贽 | 1602 |
| Buddhism | 中国撰述诸宗著述部法相宗-八识规矩颂解-明-真可 | 1603 |
| Buddhism | 中国撰述诸宗著述部禅宗语录通集-万松老人评唱天童觉和尚拈古请益录-宋-正觉 | 1607 |
| Buddhism | 中国撰述史传净土宗-诸上善人咏-明-道衍 | 1607 |
| Buddhism | 中国撰述诸宗著述部戒律宗-传授三坛弘戒法仪-明-法藏 | 1609 |
| Daoism | 续道藏-老子翼-明-焦竤 | 1610 |
| Buddhism | 中国撰述诸宗著述部法相宗-相宗八要-明-洪恩 | 1612 |
| Buddhism | 中国撰述诸宗著述部法相宗-相宗八要解-明-明昱 | 1612 |
| Daoism | 老子道德经憨山注-明-蔡德清 | 1613 |
| Daoism | 性命圭旨-明-佚名 | 1615 |
| Confucianism | 中庸直指补注-明-释智旭 | 1619 |
| Confucianism | 大学点睛补-明-释智旭 | 1619 |
| Confucianism | 论语点睛补注-明-释智旭 | 1619 |
| Buddhism | 中国撰述诸宗著述部天台宗-大乘止观法门释要-明-智旭 | 1620 |
| Buddhism | 大乘起信论裂网疏-明-释智旭 | 1620 |
| Buddhism | 金刚般若波罗蜜经观心释-明-释智旭 | 1620 |
| Buddhism | 相宗八要直解-明-释智旭 | 1620 |
| Buddhism | 金刚般若波罗蜜经破空论-明-释智旭 | 1620 |
| Buddhism | 大乘止观法门释要-明-释智旭 | 1620 |
| Buddhism | 佛说斋经科注-明-释智旭 | 1620 |
| Buddhism | 佛说阿弥陀经要解-明-释智旭 | 1620 |
| Buddhism | 妙法莲华经纶贯-明-释智旭 | 1620 |
| Buddhism | 教观纲宗-明-智旭 | 1620 |
| Buddhism | 教观纲宗释义-明-释智旭 | 1620 |
| Buddhism | 梵网经忏悔行法-明-释智旭 | 1620 |
| Buddhism | 妙法华莲经玄义节要-明-释智旭 | 1620 |
| Buddhism | 见闻录-明-释智旭 | 1620 |
| Buddhism | 成唯识论观心法要-明-释智旭 | 1620 |
| Buddhism | 中国撰述诸宗著述部天台宗-教观纲宗释义-明-智旭 | 1620 |
| Buddhism | 佛说四十二章经解-明-释智旭 | 1620 |
| Buddhism | 楞伽阿跋多罗宝经玄义-明-释智旭 | 1620 |
| Buddhism | 般若波罗蜜多心经释要-明-释智旭 | 1620 |
| Buddhism | 菩萨戒羯磨文释-明-释智旭 | 1620 |
| Buddhism | 楞伽阿跋多罗宝经义疏-明-释智旭 | 1620 |
| Buddhism | 佛遗教经解-明-释智旭 | 1620 |
| Buddhism | 中国撰述诸宗著述部三论宗-肇论略注-明-德清 | 1623 |
| Confucianism | 论语学案-明-刘宗周 | 1628 |
| Buddhism | 博山和尚参禅警语-明-元来 | 1630 |
| Buddhism | 中国撰述史传部禅宗-教外别传-明-黎眉 | 1631 |
| Daoism | 内炼金丹心法-明-沖虛子 | 1634 |
| Buddhism | 中国撰述诸宗著述部戒律宗-弘戒法仪-明-法藏 | 1635 |
| Buddhism | 中国撰述史传部禅宗-先觉集-明-陶明潜 | 1636 |
| Buddhism | 中国撰述史传部天台宗-法华灵验传-明-了圆 | 1644 |
| Confucianism | 陆桴亭论小学-清-陆世仪 | 1644 |
| Daoism | 续道藏-易因-明-李赞 | 1644 |
| Buddhism | 中国撰述诸宗著述部净土宗-净土决-明-李贽 | 1644 |
| Buddhism | 中国撰述诸宗著述部天台宗-三千有门颂略解-明-真觉 | 1644 |
| Daoism | 老子衍-清-王夫之 | 1655 |
| Buddhism | 中国撰述诸宗著述部净土宗-净土十要-明-成时 | 1655 |
| Confucianism | 四书近指-清-孙奇逢 | 1659 |
| Daoism | 龙门心法-清-王常月 | 1661 |
| Buddhism | 中国撰述诸宗著述部天台宗-随缘集-清-灵耀 | 1662 |
| Buddhism | 中国撰述诸宗著述部禅宗杂著-宝镜三昧原宗辨谬说-清-净讷 | 1663 |
| Confucianism | 读四书大全说-清-王夫之 | 1665 |
| Daoism | 老子说略-清-张尔岐 | 1668 |
| Confucianism | 张子正蒙注-清-王夫之 | 1670 |
| Confucianism | 经咫-清-陈祖范 | 1672 |
| Buddhism | 中国撰述诸宗著述部禅宗杂著-宝镜三昧本义-清-行策 | 1672 |
| Buddhism | 中国撰述史传部禅宗-续指月录-清-聂先 | 1674 |
| Buddhism | 相宗络索-清-王夫之 | 1681 |
| Confucianism | 诗说-清-惠周惕 | 1684 |
| Confucianism | 四书释地-清-阎若璩 | 1694 |
| Confucianism | 家塾教学法-清-唐彪 | 1699 |
| Confucianism | 经义考-清-朱彝尊 | 1699 |
| Buddhism | 中国撰述诸宗著述部禅宗语录别集-宗门宝积录-清-本皙 | 1703 |
| Confucianism | 禹贡锥指略例-清-胡渭 | 1705 |
| Buddhism | 中国撰述诸宗著述部真言宗-准提心要-明-尧挺 | 1709 |
| Confucianism | 诗经通论-清-姚际恒 | 1715 |
| Confucianism | 古文尚书通论辑本 礼记通论辑本-清-姚际恒 | 1715 |
| Confucianism | 经稗-清-郑方坤 | 1733 |
| Confucianism | 春秋诗话-清-劳孝舆 | 1736 |
| Confucianism | 春秋通论-清-姚际恒 | 1739 |
| Daoism | 阴符发秘-清-张清夜 | 1753 |
| Buddhism | 维摩诘经-- | 1764 |
| Confucianism | 孟子字义疏证-清-戴东原 | 1777 |
| Daoism | 道门语要-清-黄元吉 | 1790 |
| Daoism | 金丹妙诀-清-济阳子 | 1800 |
| Daoism | 道德经真义-清-黄元吉 | 1800 |
| Daoism | 道德经注释-清-黄元吉 | 1800 |
| Daoism | 唱道真言-清-青华老人 | 1800 |
| Confucianism | 毛诗故训传-清-段玉裁 | 1805 |
| Confucianism | 说文解字注-清-段玉裁 | 1807 |
| Confucianism | 孔易阐真-清-刘一明 | 1811 |
| Daoism | 通关文-清-刘一明 | 1812 |
| Daoism | 道书十二种-清-刘一明 | 1819 |
| Daoism | 百字碑注-清-素朴散人 | 1821 |
| Daoism | 泥丸李祖师女宗双修宝筏-清-闵一得 | 1826 |
| Daoism | 碧苑坛经-清-闵一得 | 1826 |
| Daoism | 天仙心传-清-闵一得 | 1826 |
| Daoism | 还源篇阐微-清-闵一得 | 1826 |
| Daoism | 阴符经玄解正义-清-闵一得 | 1826 |
| Daoism | 证道一贯真机易简录-清-傅金铨 | 1827 |
